# Supplementary material for: Integrating Social Innovation into the Curriculum of Higher Education Institutions in Latin America: Insights from the Students4Change Project
Source: MDPI journal article supplement (doi:10.3390/su13105378), 2021-05-11
Supplement: s1 [file s1]

## Supplementary File S3. List of Planned Courses

| HEI                                   |    | Course                                   | Faculty/School                                         | Program                                                                                                 |
|---------------------------------------|----|------------------------------------------|--------------------------------------------------------|---------------------------------------------------------------------------------------------------------|
| Technological Institute of Costa Rica | 1  | Ambiente Humano                          | Escuela de Ciencias Sociales                           | Varias carreras de Ingenierías                                                                          |
|                                       | 2  | Seminario de Estudios Costarricenses     | Escuela de Ciencias Sociales                           | Varias carreras Ingenierías / Administración/Turismo                                                    |
|                                       | 3  | Teoría Administrativa II                 | Escuela de Administración de Empresas (Campus Cartago) | Administración de Empresas                                                                              |
|                                       | 4  | Teoría Administrativa II                 | Escuela de Administración de Empresas (Campus Limón)   | Administración de Empresas                                                                              |
|                                       | 5  | Proyecto Ingeniería de Software          | Escuela de Ingeniería en Computación                   | Ingeniería en Computación                                                                               |
|                                       | 6  | Investigación científica                 | Escuela de Administración de Empresas (Campus Cartago) | Administración de Empresas                                                                              |
| University of Costa Rica              | 7  | Mercadeo Gerencial                       | Escuela de Administración de Negocios                  | Lic. En Dirección de Empresas                                                                           |
|                                       | 8  | Fundamentos de las Organizaciones        | Escuela de Ciencias de la Computación e Informática    | Bach. Informática Empresarial                                                                           |
|                                       | 9  | Seminario de Salud Comunitaria II        | Escuela de Estudios Generales                          | Todas las carreras                                                                                      |
|                                       | 10 | Programación I                           | Escuela de Ciencias de la Computación e Informática    | Bach. Informática Empresarial                                                                           |
|                                       | 11 | Taller de investigación I                | Sede de Guanacaste                                     | Lic. En Gestión Ecoturística                                                                            |
|                                       |    |                                          |                                                        |                                                                                                         |
| PUC Rio Janeiro, Brazil               | 12 | Gestión de Grupos                        | Departamento de Educación                              | Pregrado en Pedagogía                                                                                   |
|                                       | 13 | Sociología de la Educación               | Departamento de Educación                              | Pregrado en Pedagogía                                                                                   |
|                                       | 14 | Planeamiento de emprendimientos sociales | Departamento de Gestión y Administración de Empresas   | Dominio Adicional (certificado menor) en Emprendimiento; pregrado para distintos alumnos de los cursos. |
|                                       | 15 | Actitud y Comportamiento Emprendedor     | Departamento de Psicología                             | Dominio Adicional (certificado menor) en Emprendimiento pregrado.                                       |

| HEI                               |    | Course                                                      | Faculty/School                                       | Program                                                           |
|-----------------------------------|----|-------------------------------------------------------------|------------------------------------------------------|-------------------------------------------------------------------|
|                                   | 16 | Desarrollo de Proyectos                                     | Departamento de Gestión y Administración de Empresas | Dominio Adicional (certificado menor) en Emprendimiento pregrado. |
| PUC Rio do Sul, Brazil            | 17 | Planificación de Negocios                                   | Escuela de Negocios                                  | Administración de Empresas                                        |
|                                   | 18 | Nutrición, Salud y Comunidad                                | Escuela de Salud                                     | Nutrición                                                         |
|                                   | 19 | Instalaciones Eléctricas Prediales                          | Escuela Politécnica                                  | Ingeniería Civil                                                  |
|                                   | 20 | Emprendimientos Empresariales                               | Escuela Politécnica                                  | Ingeniería del Software                                           |
|                                   | 21 | Gestión de la Innovación                                    | Escuela de Negocios                                  | Administración de Empresas                                        |
|                                   | 22 | Comportamiento Organizacional                               | Escuela de Negocios                                  | Administración de Empresas                                        |
|                                   |    |                                                             |                                                      |                                                                   |
| University of Talca, Chile        | 23 | Módulo de Integración 2, 3, 4 y 5: Taller de Obra           | Facultad de Arquitectura, Música y Diseño            | Arquitectura                                                      |
|                                   | 24 | Intervención Comunitaria I                                  | Facultad de Ciencias de la Salud                     | Kinesiología                                                      |
|                                   | 25 | Mecánica Avanzada de Materiales                             | Facultad de Ingeniería                               | Ingeniería Civil<br>Mecánica / Ingeniería Civil Mecatrónica       |
|                                   | 26 | Derecho del Trabajo                                         | Facultad de Ciencias Jurídicas y Sociales            | Derecho                                                           |
|                                   | 27 | Motricidad Orofacial                                        | Facultad de Ciencias de la Salud                     | Fonoaudiología                                                    |
| PUC of Valparaiso, Chile          | 28 | Formulación de proyectos científicos                        | Facultad de Ciencias                                 | Carrera Pedagogía en Física                                       |
|                                   | 29 | Planeación y creación de negocios                           | Facultad de Ciencias Económicas y Administrativas    | Carrera Ingeniería Comercial                                      |
|                                   | 30 | Taller de Fabricación                                       | Facultad de Arquitectura y Urbanismo                 | Carrera de Diseño (design)                                        |
|                                   | 31 | Modelado y simulación por computador de sistemas dinámicos  | Facultad de Ingeniería                               | Carrera de Ingeniería Electrónica                                 |
|                                   | 32 | Evaluación y Apoyo en Discapacidad Intelectual Etapa Adulta | Facultad de Filosofía y Educación                    | Carrera de Educación Especial                                     |
|                                   |    |                                                             |                                                      |                                                                   |
| University of Uniminuto, Colombia | 33 | Innovación y Creatividad                                    | Ciencias Empresariales y Ciencias Sociales           | Todas las carreras                                                |

| HEI                                          |    | Course                                                          | Faculty/School                             | Program                                                                                      |
|----------------------------------------------|----|-----------------------------------------------------------------|--------------------------------------------|----------------------------------------------------------------------------------------------|
|                                              | 34 | Análisis y diagnóstico organizacional                           | Ciencias Empresariales y Ciencias Sociales | Administración de Empresas                                                                   |
|                                              | 35 | Innovación y creatividad para la generación de ideas de negocio | Ciencias Empresariales y Ciencias Sociales | Todas las carreras                                                                           |
|                                              | 36 | Práctica Profesional                                            | Ciencias Empresariales y Ciencias Sociales | Todas las carreras                                                                           |
|                                              | 37 | Gerencia Estratégica                                            | Ciencias Empresariales y Ciencias Sociales | Administración de Empresas                                                                   |
| University of Caldas, Colombia               | 38 | Métodos Comparativos                                            | Ciencias Jurídicas y Sociales              | Antropología                                                                                 |
|                                              | 39 | Análisis de problemas Agropecuarios III                         | Ciencias Agropecuarias                     | Agronomía                                                                                    |
|                                              | 40 | Práctica Institucional Nivel I                                  | Ciencias Jurídicas y Sociales              | Desarrollo Familiar                                                                          |
|                                              | 41 | Biotecnología                                                   | Ingenierías                                | Ingenierías de Alimentos                                                                     |
|                                              | 42 | Práctica de Investigación sobre lo Social I                     | Ciencias Jurídicas y Sociales              | Antropología y Sociología                                                                    |
|                                              | 43 | Emprendimiento                                                  | Ingenierías                                | Abierto a todas las carreras                                                                 |
|                                              | 44 | Profundización en telesalud: innovación social en salud         | Ciencias para la Salud                     | Medicina                                                                                     |
|                                              | 45 | Trabajo Social, diversidad y Territorio                         | Ciencias Jurídicas y Sociales              | Trabajo Social                                                                               |
|                                              | 46 | Practica Institucional Nivel 1                                  | Ciencias Jurídicas y Sociales              | Desarrollo Familiar                                                                          |
|                                              |    |                                                                 |                                            |                                                                                              |
| Technological Institute of Monterrey, Mexico | 47 | Medios, cultura y sociedad                                      | Escuela de Humanidades y Educación         | Todas las carreras de las escuelas de: ingeniería, negocios, humanidades y ciencias sociales |
|                                              | 48 | Consultoría Administrativa e Inteligencia de Negocios           | Escuela de Negocios                        | Licenciado en Administración y Estrategia de Negocios.                                       |
|                                              | 49 | Cultura Organizacional e Innovación de Negocios                 | Escuela de Negocios                        | Licenciado en Administración y Estrategia de Negocios.                                       |

| HEI                  |    | Course                             | Faculty/School                     | Program                                                                                      |
|----------------------|----|------------------------------------|------------------------------------|----------------------------------------------------------------------------------------------|
|                      | 50 | Responsabilidad Social y Ciudadana | Escuela de Humanidades y Educación | Todas las carreras de las escuelas de: ingeniería, negocios, humanidades y ciencias sociales |
|                      | 51 | Ética, Profesión y Ciudadanía      | Escuela de Humanidades y Educación | Todas las carreras de las escuelas de: ingeniería, negocios, humanidades y ciencias sociales |
|                      | 52 | Ética, Profesión y Ciudadanía      | Escuela de Humanidades y Educación | Todas las carreras de las escuelas de: ingeniería, negocios, humanidades y ciencias sociales |
|                      | 53 | Ética, Persona y Sociedad          | Escuela de Humanidades y Educación | Todas las carreras de las escuelas de: ingeniería, negocios, humanidades y ciencias sociales |
| University of Colima | 54 | Servicio Social Constitucional     | Facultad de Medicina               | Médico Cirujano y Partero                                                                    |
|                      | 55 | Servicio Social Constitucional     | Facultad de Pedagogía              | Licenciatura en Pedagogía                                                                    |
|                      | 56 | Servicio Social Constitucional     | Facultad de Trabajo Social         | Licenciatura en Trabajo Social                                                               |
|                      | 57 | Servicio Social Constitucional     | Facultad de Economía               | Licenciatura en Negocios Internacionales                                                     |
|                      | 58 | Servicio Social Constitucional     | Facultad de Economía               | Licenciatura en Negocios Internacionales, Economía y Finanzas                                |
|                      | 59 |                                    | Facultad de Mercadotecnia          | Licenciatura en Mercadotecnia                                                                |
