# Supplementary material for: Integrating Social Innovation into the Curriculum of Higher Education Institutions in Latin America: Insights from the Students4Change Project
Source: MDPI journal article supplement (doi:10.3390/su13105378), 2021-05-11
Supplement: s1 [file s1]

Supplementary File S5. Academic Articles presented in a project meeting in Bogota, April 2019

| Category                                        | Article                                                                                                                        | HEIs                                  | Country    |
|-------------------------------------------------|--------------------------------------------------------------------------------------------------------------------------------|---------------------------------------|------------|
| <b>Food Safety and Environmental Protection</b> | Acercamiento al contexto panelero en los municipios de Supía y Riosucio en el Departamento de Caldas-Colombia                  | University of Caldas                  | Colombia   |
|                                                 | El aula como espacio facilitador para el desarrollo del territorio                                                             | Uniminuto                             | Colombia   |
|                                                 | Investigación aplicada al turismo y su contribución a la innovación y al emprendedurismo social                                | University of Costa Rica              | Costa Rica |
| <b>Health and Wellness</b>                      | Innovación Social en el aula: Caso de la Materia de Medios, Cultura y Sociedad (una aproximación Metodológica)                 | TEC Monterrey                         | México     |
|                                                 | Implementación de estrategias didácticas para formar competencias en los estudiantes del curso SR-0066 de Sede del Caribe, UCR | University of Costa Rica              | Costa Rica |
|                                                 | Encuentro Latinoamericano de Innovación y Emprendimiento Social                                                                | University of Talca                   | Chile      |
|                                                 | Del dicho al hecho hay mucho trecho... en emprendimiento e innovación social en Salud. Una historia para compartir             | University of Caldas                  | Colombia   |
|                                                 | Innovando socialmente. La miel en pro de la salud y el bienestar                                                               | University of Colima                  | Mexico     |
|                                                 | Empoderamiento de las personas ciegas en la comunidad: Estrategia de promoción e inclusión social                              | University of Talca                   | Chile      |
|                                                 | Experiencia de enseñanza del Programa Students4Change.                                                                         | PUC Rio                               | Brasil     |
| <b>Equity and Inclusion</b>                     | Emprendimiento e Innovación Social escolar basada en mentorías prosociales de parte de académicos                              | University of Valparaíso              | Chile      |
|                                                 | El emprendimiento social, un aprendizaje de vida                                                                               | Technological Institute of Costa Rica | Costa Rica |
|                                                 | Inclusión de competencias en innovación social en cursos disciplinares, análisis de percepción. Caso Uniminuto                 | Uniminuto                             | Colombia   |
|                                                 | La innovación y el emprendimiento social como mecanismos de cambio a nivel cognitivo y conductual de la sociedad costarricense | Technological Institute of Costa Rica | Costa Rica |
|                                                 | Proyectos científicos de Innovación Social a nivel escolar en la formación de profesores de física                             | PUC Valparaíso                        | Chile      |

| Category             | Article                                                                                                                                                            | HEIs                                  | Country    |
|----------------------|--------------------------------------------------------------------------------------------------------------------------------------------------------------------|---------------------------------------|------------|
| Equity and Education | Desarrollo de propuestas de responsabilidad social empresarial para la promoción de la innovación y el emprendimiento social en el curso DN0424 Mercadeo Gerencial | University of Costa Rica              | Costa Rica |
|                      | Fortalecimiento del emprendimiento e innovación social en el aula                                                                                                  | Uniminuto                             | Colombia   |
|                      | Gestión de la innovación como experiencia de emprendimiento social                                                                                                 | PUC Rio do Sul                        | Brasil     |
|                      | Elegimos educación porque nos concierne. Algunas lecciones sobre el desarrollo de competencias en Innovación Social                                                | TEC Monterrey                         | México     |
|                      | Ayudando a la construcción del Banco Comunitario de la Comunidad de Cascata                                                                                        | PUC Rio Grande do Sul                 | Brasil     |
|                      | Experiencia del curso piloto: Redacción de documentos académicos en el marco del proyecto Students4Change                                                          | University of Colima                  | México     |
|                      | Proyectos de emprendimiento social en Contextos de Formación de Profesionales en Ciencias Empresariales                                                            | PUC Valparaíso                        | Chile      |
|                      | Curso de Informática Empresarial: una experiencia en el aula desarrollando competencias en Emprendimiento e Innovación Social                                      | University of Costa Rica              | Costa Rica |
|                      | Aplicación de la Innovación Social a la Vida Cotidiana. Cómo integrar la Innovación Social en cualquier entorno                                                    | TEC Monterrey                         | Mexico     |
|                      | Desarrollando competencias emprendedoras y de innovación social. El caso de Mulher en Construção                                                                   | PUC Rio do Sul                        | Brazil     |
|                      | Proyectos de Emprendimiento social en ingeniería de software                                                                                                       | Technological Institute of Costa Rica | Costa Rica |
