# Supplementary material for: Integrating Social Innovation into the Curriculum of Higher Education Institutions in Latin America: Insights from the Students4Change Project
Source: MDPI journal article supplement (doi:10.3390/su13105378), 2021-05-11
Supplement: s1 [file s1]

## Supplementary File S2.Competences Framework of Students4Change and Tools

| Functional Competence                        | Tool                                                                                                                                           |
|----------------------------------------------|------------------------------------------------------------------------------------------------------------------------------------------------|
| 1. <b>Social Analysis</b>                    | Customer Journey Map<br>Identifying an Objective Audience                                                                                      |
| 2. <b>Openness</b>                           | Brainstorming<br>Co-creating sessions<br>Creative Hats                                                                                         |
| 3. <b>Theoretical Knowledge</b>              | Delphi Method<br>Focus Groups Surveys<br>Mental Map<br>Secondary Research Sources                                                              |
| 4. <b>Entrepreneurship</b>                   | Customer Journey Map<br>People and Connections Map                                                                                             |
| 5. <b>Identifying problems and solutions</b> | Problems and Opportunities Tree                                                                                                                |
| 6. <b>Research</b>                           | Delphi Method<br>Focus Groups Surveys<br>Mental Map<br>Secondary Research Sources<br>SWOT Analysis Methodology                                 |
| 7. <b>Getting the community involved</b>     | Customer Journey Map<br>Identifying Support Networks<br>Mental Map<br>People and Connections Map                                               |
| 8. <b>Critical Thinking</b>                  | Creative Hats<br>Defining the Challenge<br>Fast Prototyping<br>Ideas Generation<br>Problems and Opportunities Tree                             |
| 9. <b>Proactiveness</b>                      | Defining Success                                                                                                                               |
| 10. <b>Productivity</b>                      | Logical Models                                                                                                                                 |
| 11. <b>Values</b>                            | Alliance Building<br>Team Building                                                                                                             |
| 12. <b>Recognising Opportunities</b>         | Customer Journey Map<br>Identifying Support Networks<br>Lean Start-Up Methodology<br>People and Connections Map<br>Social Canvas Business Plan |
| Behaviour Competences                        | Tools                                                                                                                                          |
| 13. <b>Autonomy</b>                          | Problems and Opportunities Tree<br>Project Evaluation<br>Project Management PMI Method                                                         |
| 14. <b>Commitment</b>                        | The Five Whys<br>Stakeholders Map<br>Team Building                                                                                             |
| 15. <b>Communication</b>                     | Ideas Generation<br>Mental Map<br>Pitch<br>Storytelling<br>Generating Ideas                                                                    |
| 16. <b>Empathy</b>                           | Defining the Challenge<br>Empathy Map                                                                                                          |
| 17. <b>Responsibility</b>                    | Project Management PMI Method                                                                                                                  |

|                                       |                                                                                                                                                                                                                                       |
|---------------------------------------|---------------------------------------------------------------------------------------------------------------------------------------------------------------------------------------------------------------------------------------|
| <b>18. Collaborative Team-work</b>    | Belbin Team Roles<br>Brainstorming<br>Co-creating Sessions<br>Creativity Workshop<br>Delphi Method                                                                                                                                    |
| Technical Competences                 | Tools                                                                                                                                                                                                                                 |
| <b>19. Creativity</b>                 | Brainstorming<br>Co-creating sessions<br>Creative Hats<br>Creativity workshops<br>Inspiration by Analogy<br>Storytelling                                                                                                              |
| <b>20. Managing Finance Capital</b>   | Defining Success<br>Financial Strategy<br>Investor Decision Flower<br>Lean Start-up Methodology                                                                                                                                       |
| <b>21. Social Impact</b>              | Alliance Building<br>Change Theory<br>Defining the Challenge<br>People and Connections Map<br>Stakeholders Map                                                                                                                        |
| <b>22. Leadership</b>                 | Inspiration by Analogy<br>Investor Decision Flower                                                                                                                                                                                    |
| <b>23. Social Innovation planning</b> | Defining the Challenge<br>Benchmarking<br>Brainstorming<br>Creativity workshops<br>Fast Prototyping<br>Improvement Triggers<br>Innovation Flow Diagram<br>Lean Start-up Methodology<br>PATRI Framework<br>Social Canvas Business Plan |

Source. (Students4Change 2019)
