# Supplementary material for: Integrating Social Innovation into the Curriculum of Higher Education Institutions in Latin America: Insights from the Students4Change Project
Source: MDPI journal article supplement (doi:10.3390/su13105378), 2021-05-11
Supplement: s1 [file s1]

**Supplementary File S1. State of the Art of the Social Innovation and Social Entrepreneurship within the Latin American HEIs**

| <b>University</b>                 | <b>Does the university have knowledge about SI?</b> | <b>Does the University include Courses on SI or SE?</b>                                       | <b>Are the topics of SI and SE integrated into the structure or practice of the university?</b>                                                       | <b>Does the university conduct research on Social Innovation?</b>                                           | <b>Does the university collocate funds for SI and SE?</b>                                 | <b>Do academic authorities support SI and SE?</b>                                                        | <b>Does the university have a clear policy to integrate SI and SE?</b>                          | <b>Has the university-built partnerships with the community and other stakeholders?</b> |
|-----------------------------------|-----------------------------------------------------|-----------------------------------------------------------------------------------------------|-------------------------------------------------------------------------------------------------------------------------------------------------------|-------------------------------------------------------------------------------------------------------------|-------------------------------------------------------------------------------------------|----------------------------------------------------------------------------------------------------------|-------------------------------------------------------------------------------------------------|-----------------------------------------------------------------------------------------|
| Institute Technological of Mexico | Yes. SE has been the core topic                     | Yes. "Entrepreneurial Leadership", "Leadership for Social Development" or "Entrepreneurship". | Yes. The topics of social innovation and social entrepreneurship are generally integrated into the structure and into the practice of the university. | Yes. Specifically, in the field of social economy, social entrepreneurship or linked to a welfare approach. | No. The search for funding opportunities is a challenge for ITESM                         | Yes. The university promoted specifically social entrepreneurship through labs, competitions, and so on. | Yes. The university is transforming policies and the strategy plan to include social innovation | Yes, but it is a challenge close relationship with the public sector.                   |
| University of Colima              | Yes, in the field of social entrepreneurship        | Yes, linked to social entrepreneurship                                                        | No before the project.                                                                                                                                | No. Social Innovation is new                                                                                | No. Thanks to the project university is reviewing the strategy plan to include SI and SE. | No.                                                                                                      | No.                                                                                             | Yes.                                                                                    |
| PUC Rio                           | Yes. Although, social                               | Yes. Minor Certificate in                                                                     | Yes. Mainly those                                                                                                                                     | Yes. But linked to a welfare                                                                                | Yes, specifically                                                                         | Yes, Specifically                                                                                        | Yes, regarding social                                                                           | Yes.                                                                                    |

| University     | Does the university have knowledge about SI? | Does the University include Courses on SI or SE?                                                                          | Are the topics of SI and SE integrated into the structure or practice of the university?                  | Does the university conduct research on Social Innovation?                                                                                   | Does the university collocate funds for SI and SE? | Do academic authorities support SI and SE?                                                                              | Does the university have a clear policy to integrate SI and SE?                    | Has the university-built partnerships with the community and other stakeholders? |
|----------------|----------------------------------------------|---------------------------------------------------------------------------------------------------------------------------|-----------------------------------------------------------------------------------------------------------|----------------------------------------------------------------------------------------------------------------------------------------------|----------------------------------------------------|-------------------------------------------------------------------------------------------------------------------------|------------------------------------------------------------------------------------|----------------------------------------------------------------------------------|
|                | entrepreneurship has been the core topic     | Entrepreneurship which special subjects on social innovation. The university thanks to the project was awarded by the UN. | regarding social entrepreneurship. A main challenge of the university is to encourage interdisciplinarity | approach and to social entrepreneurship. Thanks to the project, the university has published some articles on the SI field.                  | collocate funds on the Genesis incubator           | Social Entrepreneurship through by the Genesis start-ups incubator                                                      | entrepreneurship, but no as regards social innovation. Challenge of sustainability |                                                                                  |
| PUC Rio do Sul | Yes                                          | Yes. The University has a long tradition in social entrepreneurship and social change.                                    | Yes. Service Learning                                                                                     | Yes. Through the Technological management Agency, the university develops the triple helix, links between University-Society and Government. | Yes                                                | Yes. The university has created INNOVAPUC and IDEAR an interdisciplinary lab for social innovation and entrepreneurship | Yes.                                                                               | Yes.                                                                             |

| University          | Does the university have knowledge about SI? | Does the University include Courses on SI or SE?                                      | Are the topics of SI and SE integrated into the structure or practice of the university?                          | Does the university conduct research on Social Innovation? | Does the university collocate funds for SI and SE?                                | Do academic authorities support SI and SE?                                    | Does the university have a clear policy to integrate SI and SE?                                      | Has the university-built partnerships with the community and other stakeholders?                                   |
|---------------------|----------------------------------------------|---------------------------------------------------------------------------------------|-------------------------------------------------------------------------------------------------------------------|------------------------------------------------------------|-----------------------------------------------------------------------------------|-------------------------------------------------------------------------------|------------------------------------------------------------------------------------------------------|--------------------------------------------------------------------------------------------------------------------|
| PUC Valparaiso      | Yes.                                         | Yes. A training program: Program OUCV-Semillas (SEEDs)                                | Yes. Internal competitions to encourage social innovation and entrepreneurship within students and academic staff | Yes. Scarce                                                | Yes. At the beginning, on social entrepreneurship and later on social innovation. | Yes. The GEN social incubator.                                                | Yes. Specifically, social entrepreneurship. Yes. Network of academic staff, teachers, students, etc. | Yes although one of the main challenges of the university is to strength alliances and networks with stakeholders. |
| University of Talca | Yes                                          | Yes. They have included courses in cross-cutting modules of Corporate Responsibility. | Yes. They ran a pilot with 500 students                                                                           | Yes, but has to be promoted.                               | Yes. Programa Jóvenes Profesionales. Programa Prácticas Integrales.               | Yes. The last strategy plan of the university incorporates many mechanisms to | Yes. Main challenge is Sustainability                                                                | Yes. More than 100 projects with different communities have been                                                   |

| University | Does the university have knowledge about SI? | Does the University include Courses on SI or SE?                                                                                                                                                                                                           | Are the topics of SI and SE integrated into the structure or practice of the university?                   | Does the university conduct research on Social Innovation? | Does the university collocate funds for SI and SE? | Do academic authorities support SI and SE? | Does the university have a clear policy to integrate SI and SE?                                                             | Has the university-built partnerships with the community and other stakeholders? |
|------------|----------------------------------------------|------------------------------------------------------------------------------------------------------------------------------------------------------------------------------------------------------------------------------------------------------------|------------------------------------------------------------------------------------------------------------|------------------------------------------------------------|----------------------------------------------------|--------------------------------------------|-----------------------------------------------------------------------------------------------------------------------------|----------------------------------------------------------------------------------|
|            |                                              | Main challenge is to develop a multidisciplinary approach                                                                                                                                                                                                  |                                                                                                            |                                                            | Hub Maule UTalca.                                  | support SI and SE                          |                                                                                                                             | promoted since 2007.                                                             |
| UNIMINU TO | Yes                                          | Yes. The teaching program of the university has been awarded by the World Bank and the CFI. The courses range from those specialised in developing social innovation capabilities to those addressed to teach how to manage social innovation initiatives. | Yes. Through the teach, research and the engagement of the community. The university promotes competitions | Yes                                                        | Yes, Social Innovation Scientific Park.            | Yes                                        | Yes, they integrate SI and SE in the three missions of the university. The main challenges is to scaling-up the experience. | Yes. Strong partnerships.                                                        |

| <b>University</b>                     | <b>Does the university have knowledge about SI?</b>                                               | <b>Does the University include Courses on SI or SE?</b> | <b>Are the topics of SI and SE integrated into the structure or practice of the university?</b> | <b>Does the university conduct research on Social Innovation?</b> | <b>Does the university collocate funds for SI and SE?</b> | <b>Do academic authorities support SI and SE?</b> | <b>Does the university have a clear policy to integrate SI and SE?</b>                                              | <b>Has the university-built partnerships with the community and other stakeholders?</b> |
|---------------------------------------|---------------------------------------------------------------------------------------------------|---------------------------------------------------------|-------------------------------------------------------------------------------------------------|-------------------------------------------------------------------|-----------------------------------------------------------|---------------------------------------------------|---------------------------------------------------------------------------------------------------------------------|-----------------------------------------------------------------------------------------|
| University of Caldas                  | Yes, but in the university, SI is linked to corporate responsibility and social entrepreneurship. | Yes, TELESALUD program                                  | Yes, but the university has a great challenge in this task                                      | Yes, but it must be strength                                      | Yes                                                       | Yes                                               | Not at all, they recognise that they have to delve into the concept and identify what are they doing in each field. | Yes, but there is a great challenge in this task.                                       |
| Technological Institute of Costa Rica | Yes. Specifically, about social entrepreneurship                                                  | Yes                                                     | No. There are initiatives and courses but they are siloed.                                      | It is a challenge for the university                              | Yes. TEC Emprende Lab and Regionalización Universitaria   | Yes                                               | No. One of the challenges is to become a key transformative actor                                                   | Yes                                                                                     |
| University of Costa Rica              | Yes, in the field of social entrepreneurship                                                      | Yes. Mainly regarding social entrepreneurship           | No                                                                                              | Yes, in the field of Social Entrepreneurship                      | Yes                                                       | Yes                                               | No                                                                                                                  | Yes.                                                                                    |

Source. Authors' elaboration through different documents generated throughout the project.
