# Supplementary material for: Integrating Social Innovation into the Curriculum of Higher Education Institutions in Latin America: Insights from the Students4Change Project
Source: MDPI journal article supplement (doi:10.3390/su13105378), 2021-05-11
Supplement: s1 [file s1]

Supplementary File S6. Articles presented in the Kick-off Meeting in Mexico DF.  
August 2019

| Category                                                | Article                                                                                                                                                                  | HEIs                                  | Country        |
|---------------------------------------------------------|--------------------------------------------------------------------------------------------------------------------------------------------------------------------------|---------------------------------------|----------------|
| <b>Health, Food Safety and Environmental Protection</b> | Cerrando la brecha entre la investigación y la práctica: el ejemplo de un sistema de segmentación y rastreo de células para tratamientos personalizados contra el cáncer | Instituto Tecnológico de Costa Rica   | Costa Rica     |
|                                                         | Trueque: casas de parteras en el Estado de Chiapas, México. Contribuciones hacia la equidad de género en dos comunidades                                                 | TEC Monterrey                         | México         |
|                                                         | Cervecería del Volcán: emprendimiento artesanalmente en pro del beneficio ambiental, social y agrícola en el Estado de Colima                                            | Universidad de Colima                 | México         |
| <b>Inclusion and Education</b>                          | Competencias de enseñanza y aprendizaje para la innovación social: la experiencia en PUC-Valparaíso                                                                      | PUC Valparaíso/ Universidad de Aveiro | Chile/Portugal |
|                                                         | Cerrando la Brecha entre Academia y Práctica: Innovación Social a través del intercambio de conocimientos                                                                | Universidad de Dortmund               | Alemania       |
|                                                         | La Universidad volcada a la Sociedad: Análisis de un proceso de Aprendizaje en la Acción en Valencia (España) desde el enfoque de capacidades                            | Universidad de Valencia               | España         |
|                                                         | La Innovación Social en el aula ¿los proyectos que trascienden?                                                                                                          | TEC de Monterrey                      | México         |
|                                                         | La disciplina de Gestión de Innovación apoyando a la Organización No Gubernamental 101 Viralata                                                                          | PUC Rio do Sul                        | Brasil         |
|                                                         | Aplicando los conocimientos de administración de proyectos: una experiencia de índole social.                                                                            | Technological Institute of Costa Rica | Costa Rica     |
|                                                         | Desarrollando competencias las de                                                                                                                                        | TEC Monterrey                         | Mexico         |

| Category                      | Article                                                                                                                                           | HEIs                               | Country        |
|-------------------------------|---------------------------------------------------------------------------------------------------------------------------------------------------|------------------------------------|----------------|
|                               | emprendimiento social en estudiantes universitarios de primer ingreso: lecciones aprendidas                                                       |                                    |                |
|                               | Inclusión de personas con discapacidad intelectual en educación superior.                                                                         | TEC Monterrey                      | Mexico         |
| <b>Equity and Development</b> | Democratizando el acceso a la innovación                                                                                                          | S/N                                | S/N            |
|                               | Conectando aulas y comunidades para generar agentes de cambio: impulsando competencias en innovación social en la educación superior en UNIMINUTO | Uniminuto/ Politécnico de Valencia | Colombia/Spain |
|                               | Innovación social, herramienta para el impulso de la gobernanza colaborativa en Gipuzkoa                                                          | Universidad del País Vasco         | Spain          |
|                               | La construcción de ciudadanía como ser y hacer del nuevo museo TEC                                                                                | TEC Monterrey                      | Mexico         |

Source. Authors' elaboration from the Internal Report of the Meeting.
