# Supplementary material for: Integrating Social Innovation into the Curriculum of Higher Education Institutions in Latin America: Insights from the Students4Change Project
Source: MDPI journal article supplement (doi:10.3390/su13105378), 2021-05-11
Supplement: s1 [file s1]

Supplementary File S4. Project Pilots developed by students from the 10 Latin American universities participating in the Students4Change project

| Country | HEI                   | Title                                                                       | Topic                                                                               | Problem                                                                                                            |
|---------|-----------------------|-----------------------------------------------------------------------------|-------------------------------------------------------------------------------------|--------------------------------------------------------------------------------------------------------------------|
| BRAZIL  | PUC Rio<br>du Janeiro | Impact<br>Networks.<br>Integrating<br>university<br>with society            | Financial<br>Sustainability                                                         | How to achieve the financial<br>sustainability of the RUAS<br>Project                                              |
|         |                       | Cultura                                                                     | Communication.<br>Dissemination of<br>social initiatives                            | How to create opportunities<br>to promote art works and<br>projects from marginalised<br>entrepreneurs             |
|         |                       | Memorabilia.<br>Making the<br>education of<br>tomorrow<br>today             | Education. Create<br>a start-up on<br>social impact                                 | How could we apply our<br>skills in order to enhance the<br>learning experience in<br>Brazilian schools?           |
|         |                       | Visibilidad<br>CVI- Rio                                                     | Communication.<br>CVI Rio is an<br>NGO.                                             | How are the main results of<br>CVI-Rio which should be<br>communicated?                                            |
|         | PUC Rio<br>do Sul     | Start- Up<br>Piedra<br>Circular                                             | Social Initiative<br>Preventing<br>disasters. Scaling-<br>Up social<br>initiatives. | How to scale-up the start-up<br>Piedra Circular                                                                    |
|         |                       | Cycloo<br>Festival                                                          | Sustainable<br>Mobility. Scaling-<br>up                                             | How to create a replicable<br>model to promote the use of<br>bicycles in different cities of<br>Rio Grande do Sul. |
|         |                       | Banca Lupa                                                                  | Social Economy.<br>Multibank offers<br>difference<br>services to elderly<br>people. | How to promote the social<br>economy to attend elders'<br>need                                                     |
|         |                       | Juego de<br>Feed-Back                                                       | Organizational<br>Change.<br>Improve the<br>processes of the<br>NGO.                | How to improve processes of<br>the NGO Mulher em<br>Construção.                                                    |
|         |                       | Feria<br>Científica                                                         | Education.<br>Students                                                              | How to improve scientific<br>learnings in a local school.                                                          |
|         |                       | Innovando y<br>emprendiend<br>o con<br>personas<br>adultas que<br>presentan | Adult people<br>with Intellectual<br>Disability                                     | How to support the<br>integration of adult people<br>with intellectual disability<br>into the job market.          |
| CHILE   | PUC<br>Valparaiso     |                                                                             |                                                                                     |                                                                                                                    |

| Country  | HEI                        | Title                                                                                                    | Topic                                                              | Problem                                                                                                           |
|----------|----------------------------|----------------------------------------------------------------------------------------------------------|--------------------------------------------------------------------|-------------------------------------------------------------------------------------------------------------------|
|          |                            | discapacidad intelectual                                                                                 |                                                                    |                                                                                                                   |
|          |                            | Innovación Social con Fabricación Digital                                                                | Education/Sensibilisation.                                         | How to help students think outside the box.                                                                       |
|          |                            | Turismo para Sordos                                                                                      | Sustainable and Responsible Tourism.                               | Lack of a specialised tourism service for deaf people.                                                            |
|          | <b>University of Talca</b> | Educando el Manejo de Estrés del Cuidador en Madres Formadoras de la Comunidad "Espacio Down"            | Education. Self-care of caregivers of children with Down syndrome. | How to improve the wellbeing and reduce the stress of                                                             |
|          |                            | La Empatía son los Ojos para el que no puede ver. Ellos no escogieron ser ciegos, ¿Y tú, escoges verlos? | Education/Sensibilisation.                                         | Difficulty in promoting empathy for blind people in the community and the family                                  |
|          |                            | Fomento a la Acción Sindical                                                                             | Communication                                                      | Weak information about the last labour reform between blue-collar workers.                                        |
|          |                            | Diseño de prótesis canina delantera en materiales compuestos mediante el método de elementos finitos     | Social Entrepreneurship                                            | Mobility problems of dogs due to lack of affordable prostheses                                                    |
|          |                            | TRAFWE ULTU PIRE                                                                                         | Eco-tourism                                                        | How to improve the habitability conditions of tourists in mountain environments while respecting the environment. |
| COLOMBIA | <b>Uniminuto</b>           | Proyecto CULTIVARTE                                                                                      | Social Entrepreneurship                                            | Increase the Sustainable and ecological value of agrobusiness in rural territories of Tolima.                     |

| Country | HEI                  | Title                                                                                                         | Topic                                                       | Problem                                                                                        |
|---------|----------------------|---------------------------------------------------------------------------------------------------------------|-------------------------------------------------------------|------------------------------------------------------------------------------------------------|
|         |                      | Análisis y diagnóstico organizacional de la empresa productora de pan de arroz el Chino de los Mandados       | Organizational Change- Agro Food                            | How to change business models and organization of PYMES of Rice Bread rural products           |
|         |                      | Trabajadores de Tracción Manuel                                                                               | Labour Conditions                                           | How to improve labour conditions                                                               |
|         |                      | Fortalecimiento Agro productivo en el Municipio de Cucuniba                                                   | Social Entrepreneurship                                     | How to develop social initiatives with the indigenous produces of the municipality of Cucuniba |
|         |                      | Calzado Utopía                                                                                                | Social Entrepreneurship                                     | Help vulnerable women start a sustainable business                                             |
|         |                      | Aplicativo Móvil                                                                                              | Education                                                   | How to improve learning within students of secondary schools                                   |
|         |                      | Aplicativo web para seguimiento de PQR                                                                        | Organizational change                                       |                                                                                                |
|         | University of Caldas | Semillero E-Health                                                                                            | Health.                                                     | How to improve the Telehealth services                                                         |
|         |                      | Proyección del turismo en parque natural nacional Selva de Florencia Caldas                                   | Sustainable and responsible Tourism                         | How to help the community of Florencia in developing a responsible tourism.                    |
|         |                      | Acercamiento al contexto panelero en los municipios de Supía y Riosucio en el Departamento de Cladas-Colombia | Environment. Water quality problems in production processes | How to improve the quality of water used in agriculture.                                       |

| Country    | HEI                                          | Title                                                                                                     | Topic                               | Problem                                                                                                          |
|------------|----------------------------------------------|-----------------------------------------------------------------------------------------------------------|-------------------------------------|------------------------------------------------------------------------------------------------------------------|
| COSTA RICA | <b>Technological Institute of Costa Rica</b> | Gestores Activos Comunitarios                                                                             | Social Entrepreneurship             | How to help local communities to self-organise effectively                                                       |
|            |                                              | RIVERTIC                                                                                                  | Environment.                        | How to reduce pollution on water-means                                                                           |
|            |                                              | SIVET                                                                                                     | Social Entrepreneurship             | How to keep links with graduate students and strength their connections with communities                         |
|            |                                              | Ruta Limón Cultura                                                                                        | Communication                       | How to promote the culture and traditions from Limon.                                                            |
|            | <b>University of Costa Rica</b>              | Farmacia Zeledon                                                                                          | Organizational Change               | How to help pharmacies to implement social initiatives                                                           |
|            |                                              | DAV                                                                                                       | Environment                         | how to maximise the space suitable for cultivation while respecting the environment                              |
|            |                                              | Propuesta de gestión Sostenible para el desarrollo de la Actividad de cruceros en el Caribe Costarricense | Sustentable and responsable Tourism | How to promote social entrepreneurship within the cruise travel industry                                         |
|            |                                              | Ecocientízate                                                                                             | Communication /Sensibilisation      | How to raise awareness about the problem of solid waste.                                                         |
|            |                                              |                                                                                                           |                                     |                                                                                                                  |
| MEXICO     | <b>University of Colima</b>                  | Auge                                                                                                      | Social Entrepreneurship             | How to help small companies to contribute to a sustainable development                                           |
|            |                                              | Harina de Sangre                                                                                          | Social and Environmental change     | How to obtain use the blood flour to avoid blood spillage                                                        |
|            |                                              | Fundación PAKI                                                                                            | Organizational change               | How to help Paki Foundation to improve its processes                                                             |
|            |                                              | BEE Sport                                                                                                 | Environment                         | Improve the environment where the bees develop the honey.                                                        |
|            |                                              | Colmenita                                                                                                 | Social Entrepreneurship             | Create an alliance among local beer companies to promote the traditional of this product in a sustainable manner |
|            | <b>Technological</b>                         | Motiva-t                                                                                                  | Education.                          | How to improve motivation to learn within the students.                                                          |
|            |                                              |                                                                                                           |                                     |                                                                                                                  |

| Country | HEI                    | Title                                                             | Topic                                   | Problem                                                                                           |
|---------|------------------------|-------------------------------------------------------------------|-----------------------------------------|---------------------------------------------------------------------------------------------------|
|         | Institute of Monterrey | Migrantes en México                                               | Communication/Sensibilization Migration | How to raise awareness about the problematic of migrants in Mexico.                               |
|         |                        | Paridad de Género en el Tecnológico de Monterrey. Campus Santa Fé | Gender                                  | How to solve gender barriers within the institution.                                              |
|         |                        |                                                                   | Communication Sensibilization           | How to help promote a mindset change toward child labour within the coffee-communities in Mexico. |
|         |                        | Reducing Plastic in the community                                 | Communication Sensibilization           | Raise awareness in ecological problems: recycle of plastic bottles,                               |

Source. Authors' elaboration based on internal report: Innovación Social y Emprendimiento Social: una experiencia desde la Academia, Students4Change
